# Supplementary material for: Modulation of mTOR and epigenetic pathways as therapeutics in gallbladder cancer
Source: PubMed Central journal article supplement — Mol Ther Oncolytics. 2020 Dec 3;20:59–70. doi: 10.1016/j.omto.2020.11.007 (PMC7851494; doi:10.1016/j.omto.2020.11.007), 2020-12-03
Supplement: mmc1.pdf [file mmc1.pdf]

**OMTO, Volume 20**

**Supplemental Information**

**Modulation of mTOR and epigenetic pathways  
as therapeutics in gallbladder cancer**

**Dong Yang, Tao Chen, Ming Zhan, Sunwang Xu, Xiangfan Yin, Qin Liu, Wei Chen, Yunhe Zhang, Dejun Liu, Jinchun Yan, Qihong Huang, and Jian Wang**

**Anti-proliferative effect of JNJ-26481585 is at least partially mediated by CDKN1A and/or NGFR knockdown in gallbladder cancer.**

To understand the anti-proliferative mechanisms of JNJ-26481585, we extracted total RNA from GBC-SD cell lines treated with high-concentration JNJ-26481585 (50nM), low-concentration JNJ-26481585 (10nM), high-concentration UNC1999 (50nM) or DMSO separately and performed comparable RNA-seq analysis. UNC1999 is a potent, orally bioavailable and selective inhibitor of EZH2 and showed no effect in suppressing gallbladder cancer growth (Figure 3A). We introduced UNC1999 as a control in this study to rule out other possible epigenetic effects other than HDAC inhibition. Our goal is to identify genes which are differentially expressed under JNJ-26481585 treatment with various concentrations but showed no difference between DMSO and UNC1999 groups. Among the top gene candidates (Supplementary Figure 1 & Supplementary Data\_1), CDKN1A and NGFR are considered cell growth or cell cycle related<sup>1-3</sup>. Next, we used short hairpin RNA (shRNA) to knock down CDKN1A and NGFR and confirmed the knockdown efficiency of shRNAs (Supplementary Figure 2A-B). We generated GBC-SD cells stably expressing CDKN1A shRNA, or NGFR shRNA, or both shRNAs, or control shRNA, and treated these cells with JNJ-26481585. Knockdown of CDKN1A or NGFR partially reversed the cell death phenotype induced by JNJ-26481585 (Supplementary Figure 2C). Knockdown of both CDKN1A and NGFR completely rescues the cell death phenotype (Supplementary Figure 2C). These results indicated that CDKN1A and NGFR mediated the function of JNJ-26481585 in gallbladder cancer cells.

**Supplementary Table. Compounds library targeting epigenetic or ErbB pathway and corresponding CIDs on PubMed**

| <b>Epigenetic Compounds</b> | <b>CIDs</b> | <b>ErbB pathway Compounds</b> | <b>CIDs</b> | <b>ErbB pathway Compounds</b> | <b>CIDs</b> |
|-----------------------------|-------------|-------------------------------|-------------|-------------------------------|-------------|
| GSK2801                     | 73010930    | 10-DEBC                       | 10521421    | INK128                        | 45375953    |
| Bromosporine                | 72943187    | API-1                         | 24773090    | KU0063794                     | 16736978    |
| JQ1/SGCBD01                 | 46907787    | API-2                         | 56684105    | OSI027                        | 44224160    |
| PFI-1                       | 58969684    | FPA124                        | 56972210    | PP242                         | 25243800    |
| I-CBP112                    | 90488984    | SC66                          | 6018993     | CGM097                        | 53240420    |
| SGC-CBP30                   | 72201027    | SBI-0640756                   | 121241171   | GSK2334470                    | 46215815    |
| SGC0946                     | 56962337    | PHT427                        | 44240850    | 3-Methyladenine               | 1673        |
| GSK343                      | 71268957    | GSK690693                     | 16725726    | ETP45658                      | 25229608    |
| UNC1999                     | 72551585    | obatoclax                     | 16681698    | BKM120                        | 16654980    |
| A-366                       | 76285486    | AMN107                        | 644241      | KU0060648                     | 11964036    |
| UNC0638                     | 46224516    | GSK2118436                    | 44462760    | PF04691502                    | 25033539    |
| UNC0642                     | 53315878    | PLX4032                       | 42611257    | PF05212384                    | 44516953    |
| LAQ824                      | 6445533     | SCH727965                     | 46926350    | BAG956                        | 24882589    |
| JNJ-26481585                | 25067557    | Crizotinib                    | 11626560    | GDC0941                       | 17755052    |
| LBH589                      | 6918837     | PI103                         | 9884685     | LY294002                      | 3973        |
| CI-994                      | 2746        | GDC0994                       | 71727581    | PI828                         | 25181195    |
| GSK-J4                      | 71729975    | SCH772984                     | 24866313    | TG100713                      | 17751063    |
| UNC1215                     | 57339144    | GSK1120212                    | 11707110    | WORTMANNIN                    | 312145      |
| GSK-LSD1                    | 91663353    | PD0325901                     | 9826528     | ZSTK474                       | 11647372    |
| C646                        | 1285941     | Torin2                        | 51358113    | AS252424                      | 11630874    |
| IOX1                        | 459617      | COMPOUND 401                  | 10039361    | AS605240                      | 5289247     |
| olaparib                    | 23725625    | Torin1                        | 49836027    | CZC24832                      | 42623951    |
| IOX2                        | 54685215    | WYE687                        | 25229450    | GSK1059615                    | 23582824    |
| PFI-2                       | 71300326    | XL388                         | 59604787    | PIT1                          | 3664359     |
| PFI-3                       | 78243717    | RAPAMYCIN                     | 5284616     | PP121                         | 24905142    |
| LLY-507                     | 91623361    | AZD8055                       | 25262965    | NICLOSAMIDE                   | 4477        |
|                             |             |                               |             | AG879                         | 5487525     |

## Supplementary Figure 1

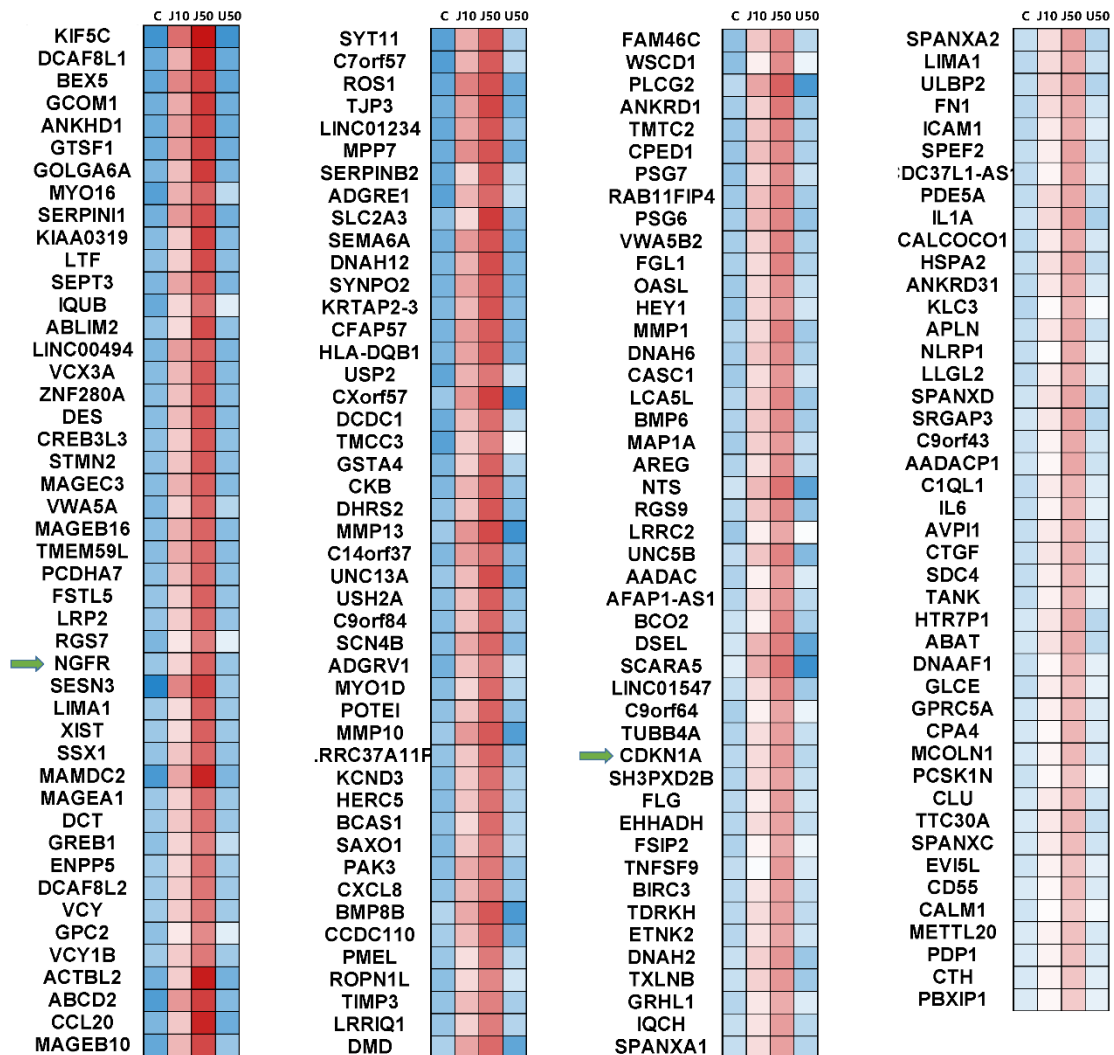

### Supplementary Figure 1. RNA-seq heatmap in GBC-SD cell line

GBC-SD cells were treated with high-concentration JNJ-26481585 (50nM), low-concentration JNJ-26481585 (10nM), high-concentration UNC1999 (50nM) or DMSO. CDKN1A and NGFR serve as two potential candidates mediating cancer cell death in the process of HDAC inhibition.

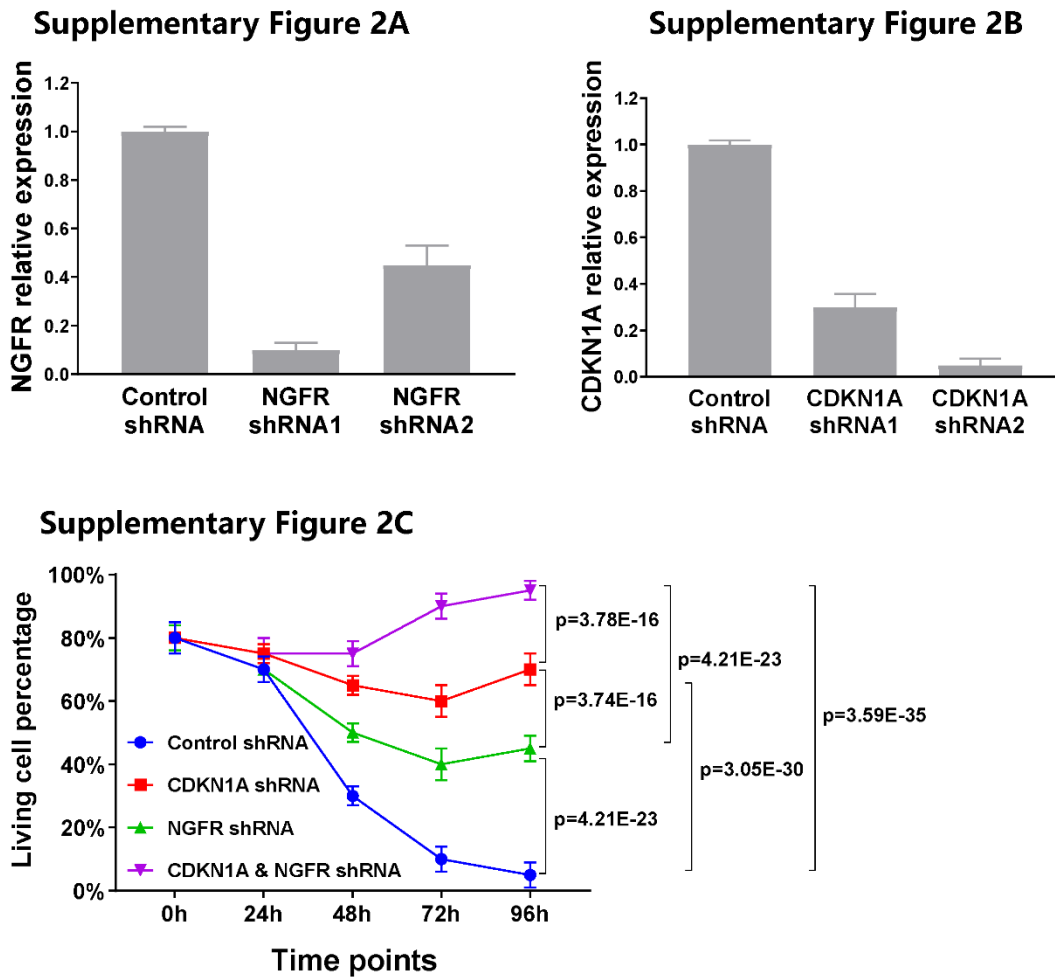

**Supplementary Figure 2. Effects of Knockdown of CDKN1A and NGFR in gallbladder cancer**

(A-B) Knockdown of CDKN1A and NGFR by shRNAs decreases the expression of these two genes. Two independent shRNA against CDKN1A or NGFR were introduced into GBC-SD cells. CDKN1A and NGFR expression were measured by quantitative real-time PCR. (C) Knockdown of CDKN1A and NGFR rescues the cell death phenotype induced by JNJ-26481585. GBC-SD cells stably expressing CDKN1A shRNA, or NGFR shRNA, or CDKN1A

and NGFR shRNA, or a control shRNA, were treated with JNJ-26481585. Cell numbers were evaluated at 0hr, 24hr, 48 hr, 72hr, and 96hr after treatment.

## REFERENCES

1. Milanovic, M, Fan, DNY, Belenki, D, Däbritz, JHM, Zhao, Z, Yu, Y, Dörr, JR, Dimitrova, L, Lenze, D, Monteiro Barbosa, IA, *et al.* (2018). Senescence-associated reprogramming promotes cancer stemness. *Nature*. *553*, 96-100.
2. Yang, HW, Chung, M, Kudo, T, and Meyer, T (2017). Competing memories of mitogen and p53 signalling control cell-cycle entry. *Nature*. *549*, 404-408.
3. Dudás, J, Dietl, W, Romani, A, Reinold, S, Glueckert, R, Schrott-Fischer, A, Dejaco, D, Johnson Chacko, L, Tuertscher, R, Schartinger, VH, *et al.* (2018). Nerve Growth Factor (NGF)-Receptor Survival Axis in Head and Neck Squamous Cell Carcinoma. *International journal of molecular sciences*. *19*.
